# Supplementary material
Source: publisher site journal article supplement (https://www.dovepress.com/get_supplementary_file.php?f=468371.docx)
Supplement: Supplementary file 1 [file get_supplementary_file.php]

**Supplementary Table 1. Attitude distribution among guardians of children with/without concealed penis (CP) diagnosis and the total participants**

|  | Strongly agree N (%) | | | Agree N (%) | | | Neutral N (%) | | | Disagree N (%) | | | Strongly disagree N (%) | | |
| --- | --- | --- | --- | --- | --- | --- | --- | --- | --- | --- | --- | --- | --- | --- | --- |
| No CP | CP | total | No CP | CP | total | No CP | CP | total | No CP | CP | total | No CP | CP | total |
| A1 | 110 (31.61) | 17 (36.96) | 127 (32.23) | 188 (54.02) | 25 (54.35) | 213 (54.06) | 48 (13.79) | 1 (2.17) | 49 (12.44) | 2 (0.57) | 3 (6.52) | 5 (1.27) | 0 (0.00) | 0 (0.00) | 0 (0.00) |
| A2 | 104 (29.89) | 14 (30.43) | 118 (29.95) | 196 (56.32) | 30 (65.22) | 226 (57.36) | 41 (11.78) | 1 (2.17) | 42 (10.66) | 7 (2.01) | 1 (2.17) | 8 (2.03) | 0 (0.00) | 0 (0.00) | 0 (0.00) |
| A3 | 127 (36.49) | 18 (39.13) | 145 (36.80) | 189 (54.31) | 23 (50.00) | 212 (53.81) | 29 (8.33) | 3 (6.52) | 32 (8.12) | 3 (0.86) | 2 (4.35) | 5 (1.27) | 0 (0.00) | 0 (0.00) | 0 (0.00) |
| A4 | 19 (5.46) | 0 (0.00) | 19 (4.82) | 66 (18.97) | 11 (23.91) | 77 (19.54) | 71 (20.40) | 7 (15.22) | 78 (19.80) | 143 (41.09) | 22 (47.83) | 165 (41.88) | 49 (14.08) | 6 (13.04) | 55 (13.96) |
| A5 | 176 (50.57) | 25 (54.35) | 201 (51.02) | 153 (43.97) | 18 (39.13) | 171 (43.40) | 16 (4.60) | 1 (2.17) | 17 (4.31) | 3 (0.86) | 2 (4.35) | 5 (1.27) | 0 (0.00) | 0 (0.00) | 0 (0.00) |
| A6 | 148 (42.53) | 20 (43.48) | 168 (42.64) | 180 (51.72) | 25 (54.35) | 205 (52.03) | 19 (5.46) | 1 (2.17) | 20 (5.08) | 1 (0.29) | 0 (0.00) | 1 (0.25) | 0 (0.00) | 0 (0.00) | 0 (0.00) |
| A7 | 197 (56.61) | 28 (60.87) | 225 (57.11) | 141 (40.52) | 17 (36.96) | 158 (40.10) | 9 (2.59) | 1 (2.17) | 10 (2.54) | 0 (0.00) | 0 (0.00) | 0 (0.00) | 1 (0.29) | 0 (0.00) | 1 (0.25) |
| A8 | 110 (31.61) | 14 (30.43) | 124 (31.47) | 198 (56.90) | 26 (56.52) | 224 (56.85) | 34 (9.77) | 2 (4.35) | 36 (9.14) | 4 (1.15) | 4 (8.70) | 8 (2.03) | 2 (0.57) | 0 (0.00) | 2 (0.51) |
| A9 | 171 (49.14) | 26 (56.52) | 197 (50.00) | 163 (46.84) | 18 (39.13) | 181 (45.94) | 13 (3.74) | 1 (2.17) | 14 (3.55) | 1 (0.29) | 1 (2.17) | 2 (0.51) | 0 (0.00) | 0 (0.00) | 0 (0.00) |

**Supplementary Table 2. Practice distribution among guardians of children with/without concealed penis (CP) diagnosis and the total participants**

|  | Always N (%) | | | Often N (%) | | | Sometimes N (%) | | | Occasionally N (%) | | | Never N (%) | | |
| --- | --- | --- | --- | --- | --- | --- | --- | --- | --- | --- | --- | --- | --- | --- | --- |
| No CP | CP | total | No CP | CP | total | No CP | CP | total | No CP | CP | total | No CP | CP | total |
| P1 | 13 (3.74) | 6 (13.04) | 19 (4.82) | 18 (5.17) | 12 (26.09) | 30 (7.61) | 68 (19.54) | 10 (21.74) | 78 (19.80) | 101 (29.02) | 16 (34.78) | 117 (29.69) | 148 (42.53) | 2 (4.35) | 150 (38.07) |
| P2 | 13 (3.74) | 1 (2.17) | 14 (3.55) | 30 (8.62) | 3 (6.52) | 33 (8.38) | 66 (18.97) | 17 (36.96) | 83 (21.07) | 136 (39.08) | 23 (50) | 159 (40.36) | 103 (29.6) | 2 (4.35) | 105 (26.65) |
| P3 | 7 (2.01) | 1 (2.17) | 8 (2.03) | 11 (3.16) | 6 (13.04) | 17 (4.31) | 32 (9.2) | 6 (13.04) | 38 (9.64) | 78 (22.41) | 17 (36.96) | 95 (24.11) | 220 (63.22) | 16 (34.78) | 236 (59.90) |
| P4 | 23 (6.61) | 8 (17.39) | 31 (7.87) | 60 (17.24) | 10 (21.74) | 70 (17.77) | 76 (21.84) | 14 (30.43) | 90 (22.84) | 102 (29.31) | 13 (28.26) | 115 (29.19) | 87 (25) | 1 (2.17) | 88 (22.34) |
| P5 | 33 (9.48) | 10 (21.74) | 43 (10.92) | 79 (22.7) | 11 (23.91) | 90 (22.84) | 96 (27.59) | 15 (32.61) | 111 (28.17) | 92 (26.44) | 10 (21.74) | 102 (25.89) | 48 (13.79) | 0 (0) | 48 (12.18) |
| P6 | 11 (3.16) | 3 (6.52) | 14 (3.55) | 34 (9.77) | 7 (15.22) | 41 (10.41) | 82 (23.56) | 13 (28.26) | 95 (24.11) | 107 (30.75) | 13 (28.26) | 120 (30.46) | 114 (32.76) | 10 (21.74) | 124 (31.47) |
| P7 | 52 (14.94) | 12 (26.09) | 64 (16.24) | 94 (27.01) | 13 (28.26) | 107 (27.16) | 89 (25.57) | 11 (23.91) | 100 (25.38) | 71 (20.4) | 9 (19.57) | 80 (20.30) | 42 (12.07) | 1 (2.17) | 43 (10.92) |
| P8 | 70 (20.11) | 12 (26.09) | 82 (20.81) | 117 (33.62) | 16 (34.78) | 133 (33.76) | 81 (23.28) | 7 (15.22) | 88 (22.34) | 44 (12.64) | 8 (17.39) | 52 (13.20) | 36 (10.34) | 3 (6.52) | 39 (9.90) |
| P9 | 22 (6.32) | 3 (6.52) | 25 (6.35) | 50 (14.37) | 5 (10.87) | 55 (13.96) | 112 (32.18) | 18 (39.13) | 130 (32.99) | 119 (34.2) | 16 (34.78) | 135 (34.26) | 45 (12.93) | 4 (8.7) | 49 (12.44) |

**Supplementary Table 3. Test results of the hypothesis.**

|  | Hypothesis | Beta (95% CI) | P-value |
| --- | --- | --- | --- |
| Hypothesis 1 | Knowledge---> Attitude | 0.63 (0.47, 0.79) | <0.001 |
| Hypothesis 2 | Attitude---> Practice | 0.43 (0.23, 0.64) | <0.001 |
| Hypothesis 3 | Knowledge---> Practice | 0.81 (0.44, 1.17) | <0.001 |
| Hypothesis 4 | Job---> Practice | 0.28 (-0.56, 1.12) | 0.511 |
| Hypothesis 5 | Location---> Attitude | -1.18 (-2.01, -0.35) | 0.006 |
| Hypothesis 6 | Diagnosis---> Practice | 3.00 (0.98, 5.02) | 0.004 |
| Hypothesis 7 | Knowledge---> Job | -0.03 (-0.06, -0.01) | 0.009 |
| Hypothesis 8 | Attitude---> Job | -0.09 (-0.13, -0.05) | <0.001 |
| Hypothesis 9 | Knowledge---> Location | -0.04 (-0.06, -0.03) | <0.001 |
